# Supplementary material
Source: Springer Nature journal article supplement (https://www.springermedizin.de/resource/supplementary/12884_2013_802_MOESM1_ESM.pdf/9458204)
Supplement: MOESM1 [file 9458204]

**20 Cluster's (UC's)**

**Baseline household survey + KAP survey +  
Health facility assessment**

**Randomization**

**Control Arm**

Standard of care

**Intervention Arm**

**Implementation of EmONC Package**

Provision of maternal and neonatal health pack +  
Community mobilization +  
Funds for emergency transportation +  
Enhanced trainings of CMWs/ TBAs and LHWs

**Training on Basic and Comprehensive EmONC service delivery to health facility (BHU/RHC/THQ) staff**
